# Supplementary material
Source: PubMed Central journal article supplement (PMC7964448)
Supplement: 3960_tables.pdf [file 3960_tables.pdf]

**On-line Table 1: Clinical indications in subjects with (signal) and without (no signal) signal abnormalities**

| Clinical Indication                             | Signal | %    | No Signal | %    | P'   |
|-------------------------------------------------|--------|------|-----------|------|------|
| Follow-up of previous abnormality               | 0      | 0    | 2         | 1.2  | 1    |
| Assess for metastatic disease; known malignancy | 3      | 11.5 | 11        | 6.6  | .409 |
| Ataxia                                          | 0      | 0    | 4         | 2.4  | 1    |
| Café-au-lait spots                              | 1      | 3.8  | 0         | 0    | .135 |
| Cardiofaciocutaneous syndrome                   | 1      | 3.8  | 0         | 0    | .135 |
| Cavernous malformation                          | 0      | 0    | 1         | 0.6  | 1    |
| Dizziness, vertigo                              | 1      | 3.8  | 3         | 1.8  | .442 |
| Developmental delay                             | 0      | 0    | 5         | 3    | 1    |
| Encephalopathy                                  | 1      | 3.8  | 4         | 2.4  | .519 |
| Extracranial mass                               | 0      | 0    | 1         | 0.6  | 1    |
| Facial vascular/lymphatic malformation          | 3      | 11.5 | 13        | 7.8  | .457 |
| Facial nerve palsy                              | 0      | 0    | 2         | 1.2  | 1    |
| Headache                                        | 5      | 19.2 | 42        | 25.1 | .513 |
| Hearing loss                                    | 0      | 0    | 1         | 0.6  | 1    |
| Intracranial hemorrhage                         | 1      | 3.8  | 0         | 0    | .135 |
| Intracranial tumor follow-up                    | 0      | 0    | 7         | 4.2  | .597 |
| Irritability                                    | 1      | 3.8  | 0         | 0    | .135 |
| Pituitary dysfunction                           | 0      | 0    | 7         | 4.2  | .597 |
| Precocious puberty                              | 1      | 3.8  | 0         | 0    | .135 |
| Psychosis                                       | 0      | 0    | 4         | 2.4  | 1    |
| Seizures                                        | 6      | 23.1 | 24        | 14.4 | .254 |
| TIA/strokelike symptoms                         | 0      | 0    | 8         | 4.8  | .601 |
| Urinary retention                               | 0      | 0    | 1         | 0.6  | 1    |
| Visual changes/abnormal eye movements           | 2      | 7.7  | 26        | 15.6 | .381 |
| Vomiting                                        | 0      | 0    | 1         | 0.6  | 1    |
| Total number                                    | 26     |      | 167       |      |      |

**On-line Table 2: Additional MRI findings in subjects with (signal) and without (no signal) signal abnormalities**

| Additional Findings                      | Signal | %    | No Signal | %    | P'   |
|------------------------------------------|--------|------|-----------|------|------|
| Acute/subacute infarct                   | 0      | 0    | 4         | 2.4  | 1    |
| Atrophy/gliosis remote from DVA          | 3      | 11.5 | 3         | 1.8  | .033 |
| Cavernous malformation                   | 5      | 19.2 | 7         | 4.2  | .012 |
| Chiari 1 or low-lying cerebellar tonsils | 2      | 7.7  | 3         | 1.8  | .135 |
| Cranial nerve enhancement                | 0      | 0    | 2         | 1.2  | 1    |
| Delayed/incomplete myelination           | 0      | 0    | 1         | 0.6  | 1    |
| Ectopic posterior pituitary              | 0      | 0    | 1         | 0.6  | 1    |
| Extracalvarial mass                      | 0      | 0    | 3         | 1.8  | 1    |
| Global parenchymal volume loss           | 1      | 3.8  | 2         | 1.2  | .354 |
| Gray matter heterotopia                  | 0      | 0    | 4         | 2.4  | 1    |
| Intracranial hemorrhage                  | 1      | 3.8  | 0         | 0    | .135 |
| Multiple leptomeningeal lesions          | 0      | 0    | 1         | 0.6  | 1    |
| No other findings                        | 12     | 46.2 | 58        | 34.7 | .26  |
| Intracranial mass/lesion                 | 0      | 0    | 25        | 15   | .029 |
| Pineal gland abnormality                 | 0      | 0    | 3         | 1.8  | 1    |
| Pituitary cyst                           | 0      | 0    | 1         | 0.6  | 1    |
| Postsurgical change                      | 0      | 0    | 7         | 4.2  | .597 |
| Retinoblastoma                           | 0      | 0    | 1         | 0.6  | 1    |
| Scalp vascular/lymphatic malformation    | 0      | 0    | 12        | 7.2  | .375 |
| Septo-optic dysplasia                    | 0      | 0    | 1         | 0.6  | 1    |
| Signal abnormality remote from DVA       | 2      | 7.7  | 25        | 15   | .542 |
| Ventricular enlargement                  | 0      | 0    | 3         | 1.8  | 1    |
| Total                                    | 26     |      | 167       |      |      |
